# Supplementary material for: Dynamic changes in intramedullary pressure 72 hours after spinal cord injury
Source: PubMed Central journal article supplement — Neural Regen Res. 2019 May;14(5):886–95. doi: 10.4103/1673-5374.249237 (PMC6375044; doi:10.4103/1673-5374.249237), 2019-05
Supplement: NRR-14-886_Suppl1.pdf [file NRR-14-886_Suppl1.pdf]

## OPEN PEER REVIEW REPORT 1

**Reviewer:** Kyoung-Tae Kim, Kyungpook National University, Republic of Korea.

### Comments to authors:

The authors make the cord pressure changes after SCI using the telemetry system. It is an interesting topic in SCI. I have some questions and comments for the paper.

#### General comments

1. Could you figure out the experimental design as Figure 1? It will be very helpful to understand your works.
2. Also, could you figure out the overall mechanism for Telemetry system? You mentioned the telemetry system could make more accurate to analyze, so we have to know the overall mechanism of Telemetry system.
3. The cord swollen after SIC could be influenced by the injury mechanism and severity, but your experiment had only one severity and model. It will be better to add this points in the limitation section.

#### Specific comments

P7, 50th line, Do you mean the “control” (not “anesthesia”) group and “conscious” group?

P8, 48th line, Could you compare the blood volume between the SCI and control group? SCI and probe insertion could make some hemorrhage, so we have to know the probe insertion could increase the hemorrhagic chance.

P14, 48th, How do you know that the results of IMPC in conscious animals were more accurate? I cannot find any evidence from you results.
